# Supplementary material for: Submicrometre-scale polyaniline colloidal spheres: photopolymerization preparation using fluorescent carbon nitride dots as a photocatalyst
Source: Royal Society of Chemistry journal article supplement (doi:10.1039/c2cy00439a), 2011-12-22
Supplement: c2cy00439a.pdf [file c2cy00439a.pdf]

## Electronic Supplementary Information

# Submicrometer-scale polyaniline colloidal spheres: photopolymerization preparation using fluorescent carbon nitride dots as a photocatalyst

Xiaoyun Qin,<sup>a</sup> Sen Liu,<sup>a</sup> Wenbo Lu,<sup>a</sup> Haiyan Li,<sup>a</sup> Guohui Chang,<sup>a</sup> Yingwei Zhang,<sup>a</sup>

Jingqi Tian,<sup>ab</sup> Yonglan Luo,<sup>a</sup> Abdullah M. Asiri,<sup>cd</sup> Abdulrahman O. Al-Youbi<sup>cd</sup> and

Xuping Sun<sup>\*acd</sup>

<sup>a</sup> State Key Lab of Electroanalytical Chemistry, Changchun Institute of Applied Chemistry, Chinese Academy of Sciences, Changchun 130022, Jilin, China

<sup>b</sup> Graduate School of the Chinese Academy of Sciences, Beijing 100039, China

<sup>c</sup> Chemistry Department, Faculty of Science, King Abdulaziz University, Jeddah 21589, Saudi Arabia

<sup>d</sup> Center of Excellence for Advanced Materials Research, King Abdulaziz University, Jeddah 21589, Saudi Arabia

\*To whom correspondence should be addressed. Tel/Fax: +86-431-85262065. E-mail: sunxp@ciac.jl.cn

## Experimental Section

$\text{CCl}_4$ , 1,2-ethylenediamine (EDA),  $\text{AgNO}_3$  and  $\text{H}_2\text{O}_2$  were purchased from Aladin Ltd. (Shanghai, China), 4-nitrophenol (4-NP) was purchased from Sinopharm Chemical Reagent Co. Ltd and sodium borohydride ( $\text{NaBH}_4$ ) were purchased from Tianjin Fuchen Chemical Corp. All the chemicals were used as received without further purification. The water used throughout all experiments was purified through a Millipore system. Phosphate buffer saline (PBS) was prepared by mixing stock solutions of  $\text{NaH}_2\text{PO}_4$  and  $\text{Na}_2\text{HPO}_4$  and a fresh solution of  $\text{H}_2\text{O}_2$  was prepared daily.

The fluorescent CNDs were prepared follow our previous work by polymerization of  $\text{CCl}_4$  and EDA under reflux heating. In a typical synthesis, 0.69 mL of EDA was added to 1 mL of  $\text{CCl}_4$  solution. After that, the mixture was heated to 80 °C for 60 min. The excess precursors and resulting small molecules were removed by dialyzing against water through a dialysis membrane for 1 day. The resultant CNDs were dispersed in water for further characterization and use.

The synthesis of PANICSSs was carried out in a quartz cuvette using CNDs as photocatalyst. 20  $\mu\text{L}$  of CNDs, 20  $\mu\text{L}$  of aniline were injected into 3 mL of HCl (0.3 M) aqueous solution in the quartz cuvette. The mixture after ultrasonic disperse for 10 min was placed under high-pressure mercury lamp (50 W) for 2 h to get brown solution.

Ultraviolet-visible (UV-vis) absorption spectra were recorded on a UV5800 spectrophotometer. Scanning electron microscopy (SEM) measurements were made on a XL30 ESEM FEG scanning electron microscope at an accelerating applied

potential of 20 kV. Transmission electron microscopy (TEM) measurements were made on a HITACHI H-8100 EM (Hitachi, Tokyo, Japan) with an accelerating applied potential of 200 kV. The sample for TEM characterization was prepared by placing a drop of the dispersion on carbon-coated copper grid and dried at room temperature. Fourier transform infrared (FTIR) spectroscopic measurements were taken on a Bruker Vertex 70 Fourier transform spectrometer. Fluorescence emission spectra were recorded on a Shimadzu RF-5301 spectrofluorophotometer (Shimadzu Corporation, Kyoto, Japan).

Electrochemical measurements were performed with a CHI 660D electrochemical analyzer (CH Instruments, Inc., Shanghai). A conventional three-electrode cell was used, including a glassy carbon electrode (GCE, geometric area = 0.07 cm<sup>2</sup>) as the working electrode, a Ag/AgCl (3 M KCl) electrode as the reference electrode, and platinum foil as the counter electrode. All potentials given in this work were referred to the Ag/AgCl electrode. All the experiments were carried out at ambient temperature. The suspension of AgNPs-PANICSs was dropped onto the pre-polished mirror like surface of GCE. Chitosan (0.5 wt %) was used as fixative to form a strong film to modify the electrode.

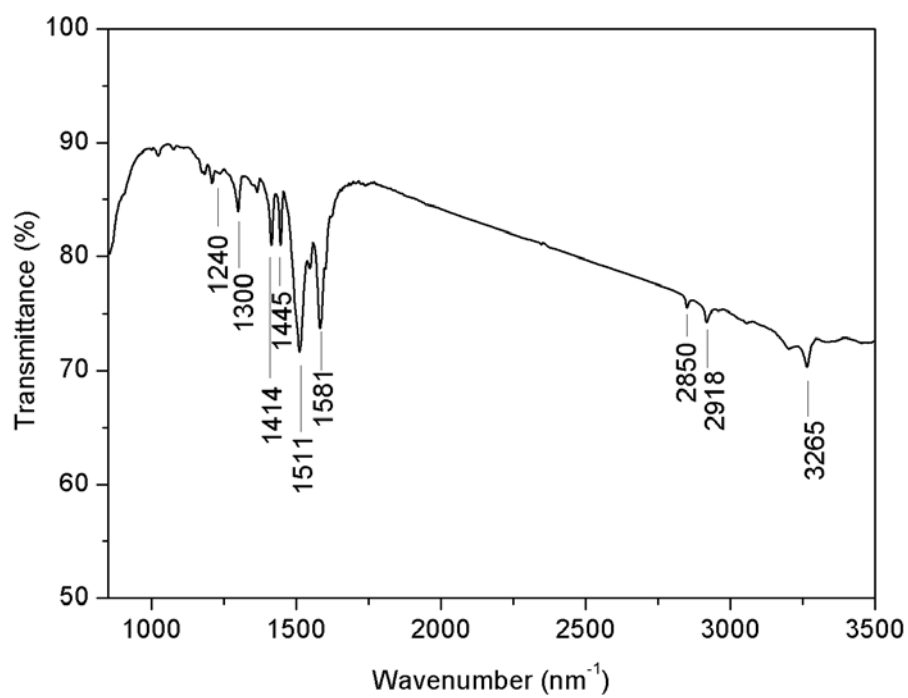

**Fig. S1** FTIR spectra of the resulting photopolymerization product.

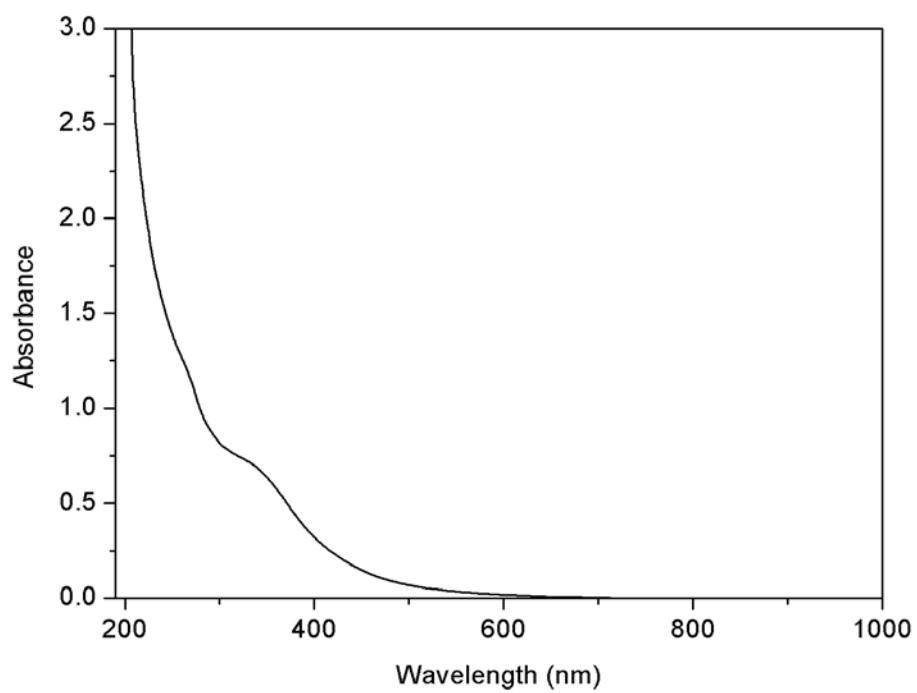

**Fig. S2** UV-vis absorption spectra of the aqueous dispersions of CNDs.

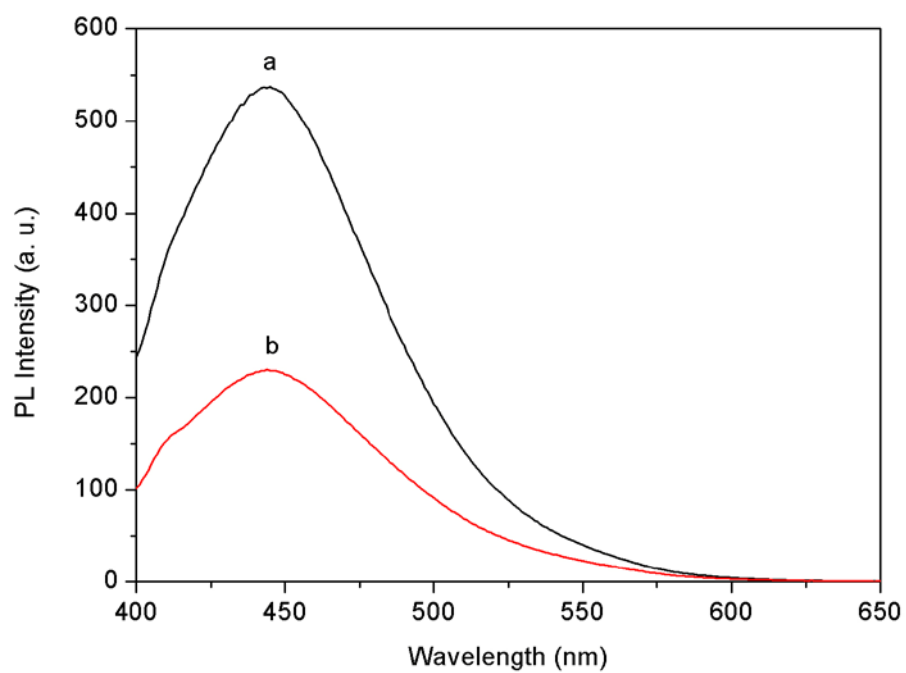

**Fig. 3** PL emission spectra of CNDs-aniline mixture (a) before and (b) after 2-h UV irradiation.

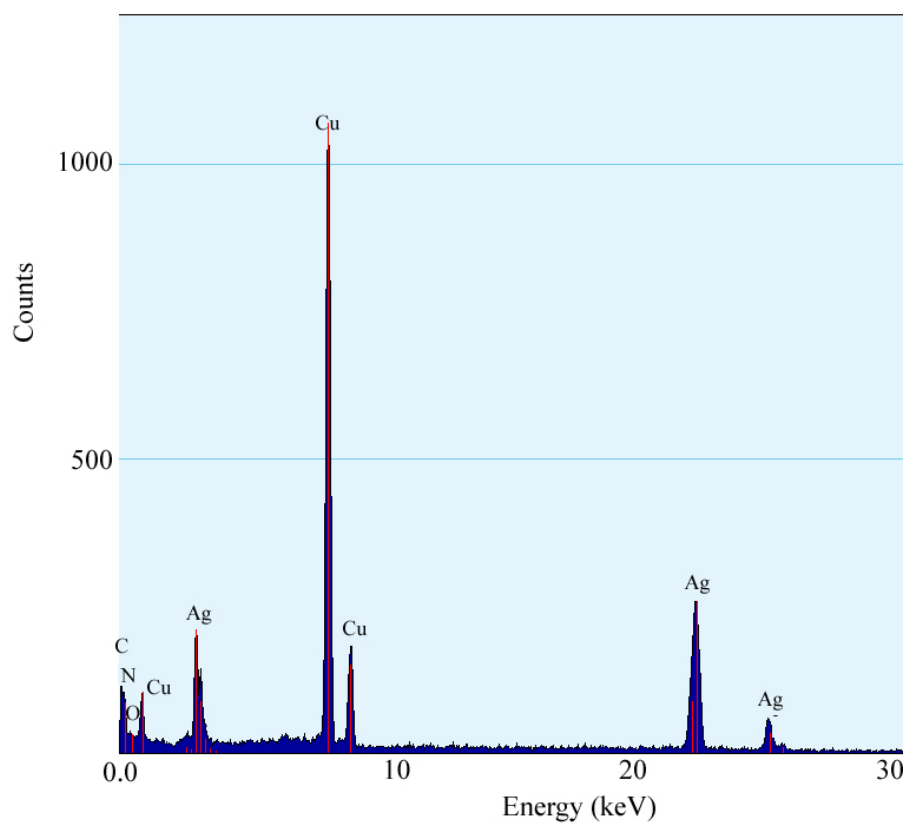

**Fig. S4** The corresponding energy-dispersed spectrum of PANICSS after incubation with an aqueous  $\text{AgNO}_3$  solution.
